# Supplementary material for: Comparison of confidence interval methods for an intra-class correlation coefficient (ICC)
Source: BMC Med Res Methodol. 2014 Nov 22;14:121. doi: 10.1186/1471-2288-14-121 (PMC4258044; doi:10.1186/1471-2288-14-121)
Supplement: Supplementary file 5 — Additional file 5:Supplement is a table of results for designs with 4, 5, 6 and 7 factor levels for laboratories.(XLS 26 KB) [file 12874_2014_1133_MOESM5_ESM.xls]

## Sheet: Sheet1
design	method	center_mean	center_sd	width_mean	width_sd	coverage
99.4	GPQ	0.558385	0.117077	0.665001	0.122344	0.9492
99.4	MLSCI	0.557773	0.116233	0.668311	0.120772	0.9517
99.4	Unif	0.49489	0.118436	0.749633	0.108693	0.8952
90.4	GPQ	0.556173	0.111628	0.603898	0.12077	0.9491
90.4	MLSCI	0.556992	0.111192	0.609168	0.120005	0.9514
90.4	Unif	0.497756	0.116518	0.705116	0.108288	0.898
80.4	GPQ	0.570597	0.104891	0.516918	0.1163	0.9511
80.4	MLSCI	0.573697	0.104879	0.523099	0.117411	0.9559
80.4	Unif	0.520699	0.11515	0.632867	0.116627	0.914
71.4	GPQ	0.639839	0.082898	0.35949	0.0677308	0.9557
71.4	MLSCI	0.648599	0.0819194	0.354622	0.0709158	0.9608
71.4	Unif	0.625067	0.0904708	0.437941	0.0956389	0.9713
99.5	GPQ	0.582844	0.114966	0.59663	0.109125	0.9447
99.5	MLSCI	0.582214	0.114191	0.599834	0.107564	0.948
99.5	Unif	0.550103	0.124451	0.65852	0.106328	0.9158
90.5	GPQ	0.584616	0.108353	0.53466	0.10845	0.9479
90.5	MLSCI	0.585377	0.107849	0.539403	0.107476	0.9513
90.5	Unif	0.55776	0.117155	0.604266	0.106627	0.9279
80.5	GPQ	0.602354	0.0976865	0.448329	0.0985666	0.9543
80.5	MLSCI	0.60542	0.0976656	0.453088	0.0995681	0.9576
80.5	Unif	0.584533	0.106782	0.51904	0.107604	0.9516
71.5	GPQ	0.659144	0.0758833	0.316905	0.0508116	0.9552
71.5	MLSCI	0.667229	0.074842	0.311084	0.051501	0.9572
71.5	Unif	0.663263	0.0794424	0.34317	0.0631496	0.9624
99.6	GPQ	0.600292	0.112136	0.546458	0.0996764	0.9439
99.6	MLSCI	0.599783	0.111482	0.549378	0.0981517	0.9457
99.6	Unif	0.584204	0.121876	0.589575	0.100953	0.9286
90.6	GPQ	0.603309	0.103502	0.487871	0.0975109	0.9494
90.6	MLSCI	0.604362	0.103267	0.491473	0.0969829	0.9507
90.6	Unif	0.59219	0.112496	0.534679	0.100814	0.9417
80.6	GPQ	0.622123	0.0916301	0.40343	0.0851552	0.9529
80.6	MLSCI	0.625575	0.0916666	0.406326	0.0862488	0.9558
80.6	Unif	0.618062	0.0989359	0.447466	0.0942668	0.9541
71.6	GPQ	0.668443	0.0728671	0.295545	0.0440239	0.9531
71.6	MLSCI	0.675473	0.0719543	0.290175	0.0436996	0.9551
71.6	Unif	0.676425	0.0755999	0.306358	0.0497462	0.9544
99.7	GPQ	0.6129	0.106442	0.510359	0.0890145	0.9508
99.7	MLSCI	0.612525	0.105945	0.512873	0.0877274	0.9522
99.7	Unif	0.606191	0.116012	0.541143	0.0928834	0.9366
90.7	GPQ	0.615892	0.0989541	0.453283	0.0872057	0.9508
90.7	MLSCI	0.616788	0.0986868	0.457026	0.0867211	0.9524
90.7	Unif	0.612665	0.106786	0.487321	0.0911667	0.9425
80.7	GPQ	0.635615	0.0868341	0.373389	0.0741157	0.954
80.7	MLSCI	0.638878	0.0868092	0.375873	0.0751914	0.9566
80.7	Unif	0.637203	0.0924044	0.404059	0.0817991	0.9556
71.7	GPQ	0.674166	0.0702013	0.282925	0.0399559	0.9527
71.7	MLSCI	0.680241	0.069403	0.278493	0.0396289	0.953
71.7	Unif	0.683171	0.0723363	0.288354	0.0436571	0.9504
